# Supplementary material for: Hypolipidemic effect of Youcha in hyperlipidemia rats induced by high-fat diet
Source: Royal Society of Chemistry journal article supplement (doi:10.1039/c7fo00089h), 2017-01-01
Supplement: c7fo00089h1.pdf [file c7fo00089h1.pdf]

**Supplementary figure:**

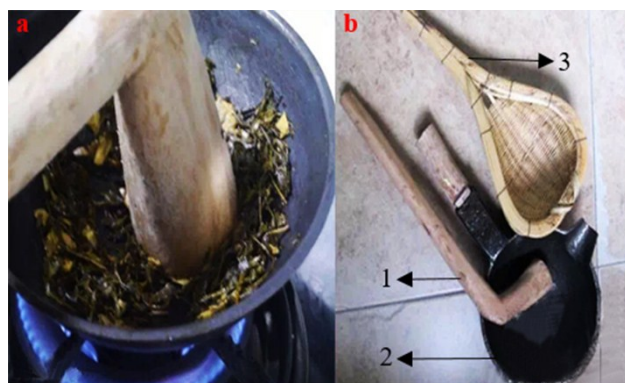

**Fig. S1** Preparation and tools of Youcha. a: Mashing with a like "7" shape wooden mallet. b: Tools: 1, "7" shape wooden mallet; 2, Dedicated iron tea pot; 3, Bamboo sieve.

**Supplementary table:**

**Table. S1** Effects of Youcha on food intake in each group.

| Group                     | NMD                     | HFD                     | HFD+P                   | HFD+L                   | HFD+M                   | HFD+H                   |
|---------------------------|-------------------------|-------------------------|-------------------------|-------------------------|-------------------------|-------------------------|
| Food intake (g/d per rat) | 43.08±1.86 <sup>a</sup> | 44.69±3.23 <sup>a</sup> | 43.38±3.75 <sup>a</sup> | 43.47±3.32 <sup>a</sup> | 42.53±2.83 <sup>a</sup> | 41.35±2.94 <sup>a</sup> |

Datum are expressed as mean value ± standard deviation (n=10). <sup>a</sup>Mean values within the same row with different superscripted letters differ significantly ( $p < 0.05$ ). NMD: normal diet, HFD: high-fat diet, HFD+P: Xuezhikang(120 mg/kg·d), HFD+L: Youcha (150 mg/kg·d), HFD+M: Youcha (750 mg/kg·d), HFD+H: Youcha (1500 mg/kg·d).
